# Supplementary material for: PENet—a scalable deep-learning model for automated diagnosis of pulmonary embolism using volumetric CT imaging
Source: PubMed Central journal article supplement (PMC7181770; doi:10.1038/s41746-020-0266-y), 2020-04-24
Supplement: 41746_2020_266_MOESM1_ESM.pdf [file 41746_2020_266_MOESM1_ESM.pdf]

## Supplementary Information

**Supplementary Table 1.** Table shows the core ingredients of the PENet architecture

| <b>Core ingredients of the network</b>                     | <b>Details</b>                                     |
|------------------------------------------------------------|----------------------------------------------------|
| Total number of learning parameters                        | 28,398,705                                         |
| PE-Net Encoder                                             | 4                                                  |
| PE-Net Bottleneck                                          | 16 (3 + 4 + 6 + 3)                                 |
| SE-Block                                                   | 16                                                 |
| PE-Net Unit                                                | 32 without SE, 15 with SE                          |
| Input PE-Net unit, not in PE-Net Encoder                   | Kernel size = 7, Stride = (1,2,2), Padding=(3,3,3) |
| CNN of first PE-Net unit in PE-Net Encoder                 | Kernel size = 1, Stride = 1, Padding = None        |
| CNN of second PE-Net unit in PE-Net Encoder                | Kernel size = 3, Stride = 1, Padding = 1           |
| CNN of third PE-Net unit in PE-Net Encoder (With SE-block) | Kernel size = 1, Stride = 1, Padding = None        |

**Supplementary Table 2:** Optimized hyper-parameters for PENet

| Parameters | Learning rate | Weight decay | Decay step | Batch size | Num epochs | Optimizer | Momentum | SDG dampening |
|------------|---------------|--------------|------------|------------|------------|-----------|----------|---------------|
| Value      | 1e-2          | 1e-3         | 600000     | 16         | 50         | SDG       | 0.9      | 0.9           |
